# Supplementary material for: Modulation of mTOR signaling as a strategy for the treatment of Pompe disease
Source: PubMed Central journal article supplement (PMC5331267; doi:10.15252/emmm.201606547), 2017-01-27

Source data for Figure 2

2A

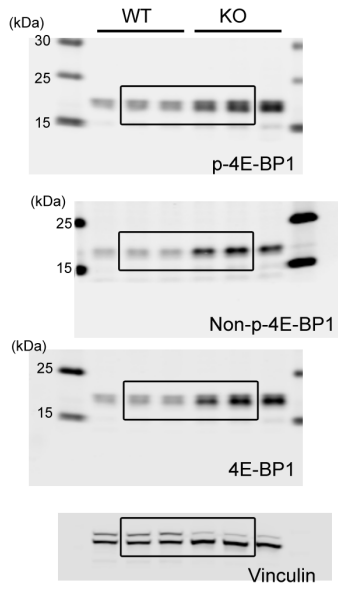

2B

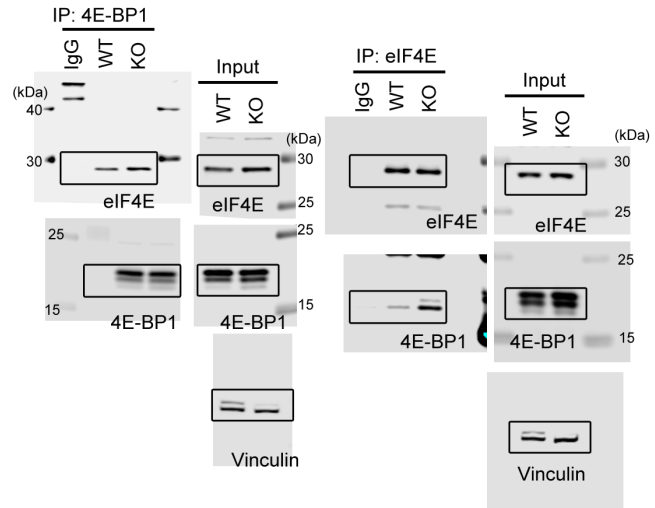

2C

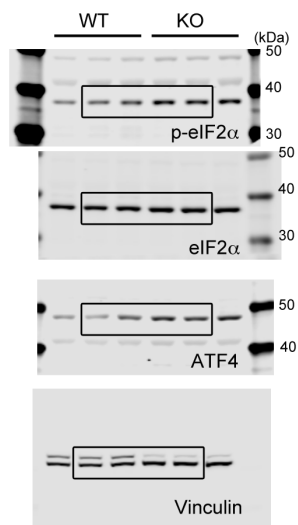

2D

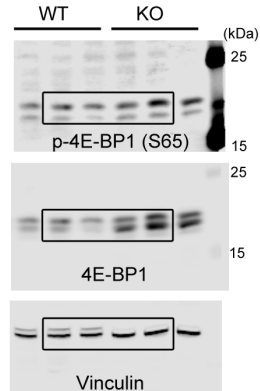

2E

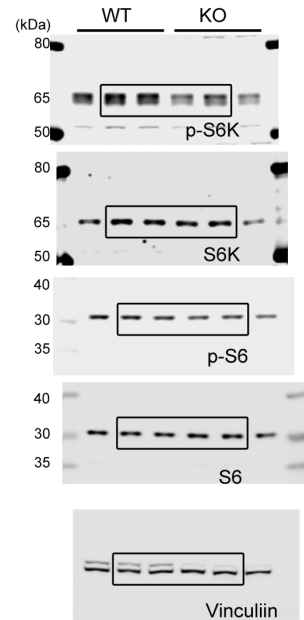

Supplement: EMMM-9-353-s006.pdf [file EMMM-9-353-s006.pdf]
