# Supplementary material for: Modulation of mTOR signaling as a strategy for the treatment of Pompe disease
Source: PubMed Central journal article supplement (PMC5331267; doi:10.15252/emmm.201606547), 2017-01-27
Supplement: EMMM-9-353-s009.pdf [file EMMM-9-353-s009.pdf]

Source data for Figure 5

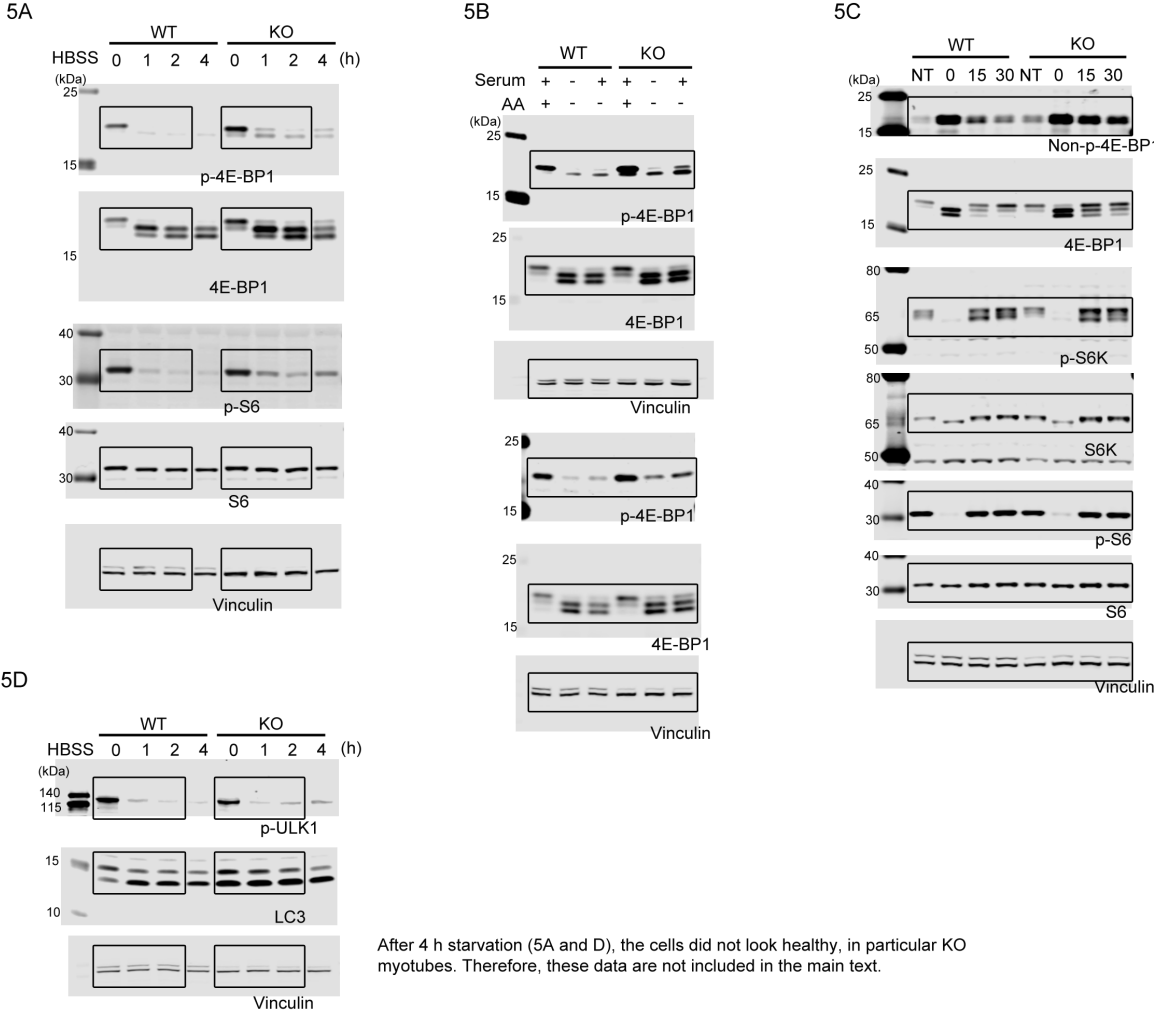

After 4 h starvation (5A and D), the cells did not look healthy, in particular KO myotubes. Therefore, these data are not included in the main text.
