# Supplementary material for: Modulation of mTOR signaling as a strategy for the treatment of Pompe disease
Source: PubMed Central journal article supplement (PMC5331267; doi:10.15252/emmm.201606547), 2017-01-27

# Source data for Figure 6B

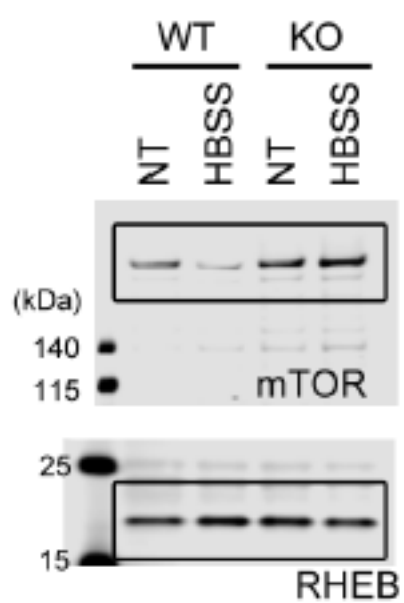

Supplement: EMMM-9-353-s010.pdf [file EMMM-9-353-s010.pdf]
