# Supplementary material for: Modulation of mTOR signaling as a strategy for the treatment of Pompe disease
Source: PubMed Central journal article supplement (PMC5331267; doi:10.15252/emmm.201606547), 2017-01-27
Supplement: EMMM-9-353-s012.pdf [file EMMM-9-353-s012.pdf]

Source data for Figure 9

9E

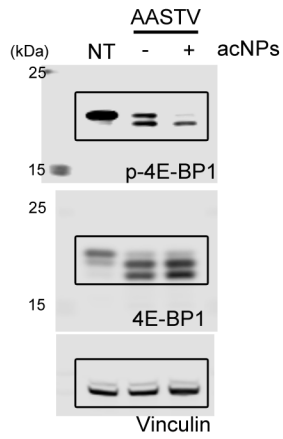

9F

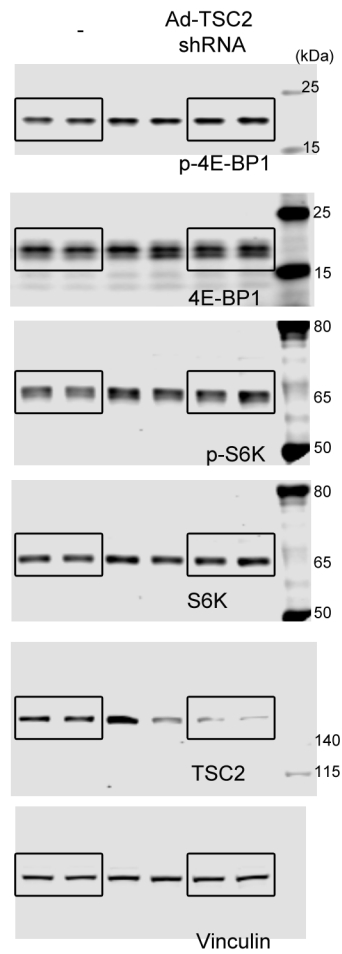

9G

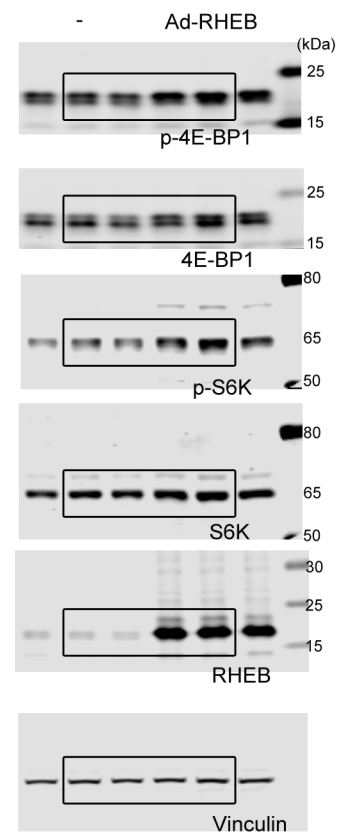

Lanes 1 and 2 were selected in 9F because they show consistent levels of TSC2. Lanes 5 and 6 were selected because they exhibit efficient TSC2 knockdown.
